# Supplementary material for: A comprehensive investigation of the (Ti0.5Zr0.5)1(Fe0.33Mn0.33Cr0.33)2 multicomponent alloy for room-temperature hydrogen storage designed by computational thermodynamic tools
Source: Royal Society of Chemistry journal article supplement (doi:10.1039/d3ta02197a), 2023-01-01
Supplement: d3ta02197a1.pdf [file d3ta02197a1.pdf]

## SUPPLEMENTARY MATERIAL

### **A comprehensive investigation of the $(\text{Ti}_{0.5}\text{Zr}_{0.5})_1(\text{Fe}_{0.33}\text{Mn}_{0.33}\text{Cr}_{0.33})_2$ multicomponent alloy for room-temperature hydrogen storage designed by computational thermodynamic tools**

Jéssica Bruna Ponsoni<sup>a,b</sup>, Mateusz Balcerzak<sup>\*b,c</sup>, Walter José Botta<sup>a,d</sup>, Michael Felderhoff<sup>b</sup>, Guilherme Zepon<sup>\*a,d</sup>

- a. Graduate Program in Materials Science and Engineering (PPGCEM/UFSCar) - Rodovia Washington Luiz, km 235, Federal University of Sao Carlos, São Carlos, São Paulo CEP: 13565-905, Brazil
- b. Department of Heterogeneous Catalysis, Max-Planck-Institut für Kohlenforschung, Kaiser-Wilhelm Platz 1, Mülheim an der Ruhr, 45470, Germany
- c. Institute of Materials Science and Engineering, Poznan University of Technology, Jana Pawła II No 24, Poznan 61-138 Poland
- d. Department of Materials Engineering (DEMa/UFSCar) - Rodovia Washington Luiz, km 235, Federal University of São Carlos, São Carlos CEP: 13565-905, Brazil

\*Corresponding authors: balcerzak@kofo.mpg.de, zepon@ufscar.br

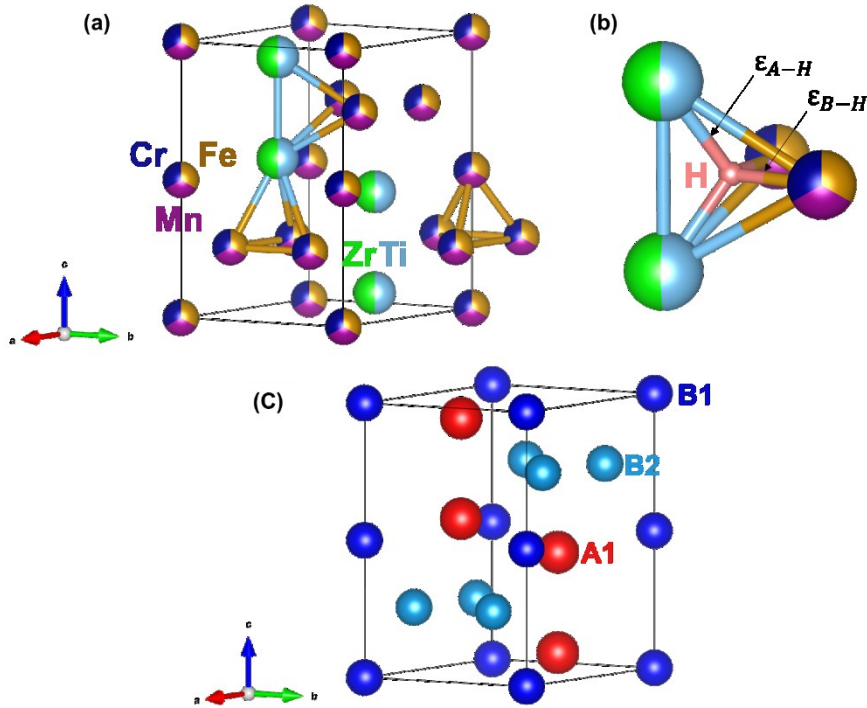

**Fig. S1.** (a) Unit cell of the hexagonal C14 Laves phase (MgZn<sub>2</sub>-type). The three types of tetrahedral interstices available are A<sub>2</sub>B<sub>2</sub>, AB<sub>3</sub>, and B<sub>4</sub>. (b) A<sub>2</sub>B<sub>2</sub> sites are formed by a tetrahedron having two bonds with energy ε<sub>A-H</sub> and two bonds with energy ε<sub>B-H</sub>. (c) Unit cell showing the Wyckoff position: 4f (A1), 2a (B1), and 6h (B2) positions. The red spheres represent the A1 positions, and the blue spheres represent the B positions (B positions are divided into two different crystallographic positions: B1 = dark blue and B2 = light blue).

**Table S1.** Crystal structure of C14 Laves phase in the (Ti<sub>0.5</sub>Zr<sub>0.5</sub>)<sub>1</sub>(Fe<sub>0.33</sub>Mn<sub>0.33</sub>Cr<sub>0.33</sub>)<sub>2</sub> alloy.

| Phase                                         | Sublattices | Wyckoff position                                  | Element | Occupation factor <sup>b</sup> |
|-----------------------------------------------|-------------|---------------------------------------------------|---------|--------------------------------|
| <b>C14</b><br><b>P6<sub>3</sub>/mmc (194)</b> | A1          | 4f ( $\frac{1}{3}, \frac{2}{3}, z$ ) <sup>a</sup> | Ti      | 1/2                            |
|                                               |             |                                                   | Zr      | 1/2                            |
|                                               | B1          | 2a (0, 0, 0)                                      | Fe      | 1/3                            |
|                                               |             |                                                   | Mn      | 1/3                            |
|                                               |             |                                                   | Cr      | 1/3                            |
|                                               | B2          | 6h ( $x, 2x, \frac{1}{4}$ ) <sup>a</sup>          | Fe      | 1/3                            |
|                                               |             |                                                   | Mn      | 1/3                            |
|                                               |             |                                                   | Cr      | 1/3                            |

<sup>a</sup> Fraction coordinates z of position 4f, and x, y of position 6h was considered the same as that of the ZrCr<sub>2</sub> Laves phase, i.e., 0.064, 0.835, and 0.67, respectively.

<sup>b</sup> Occupation factor was calculated using the equiatomic composition.

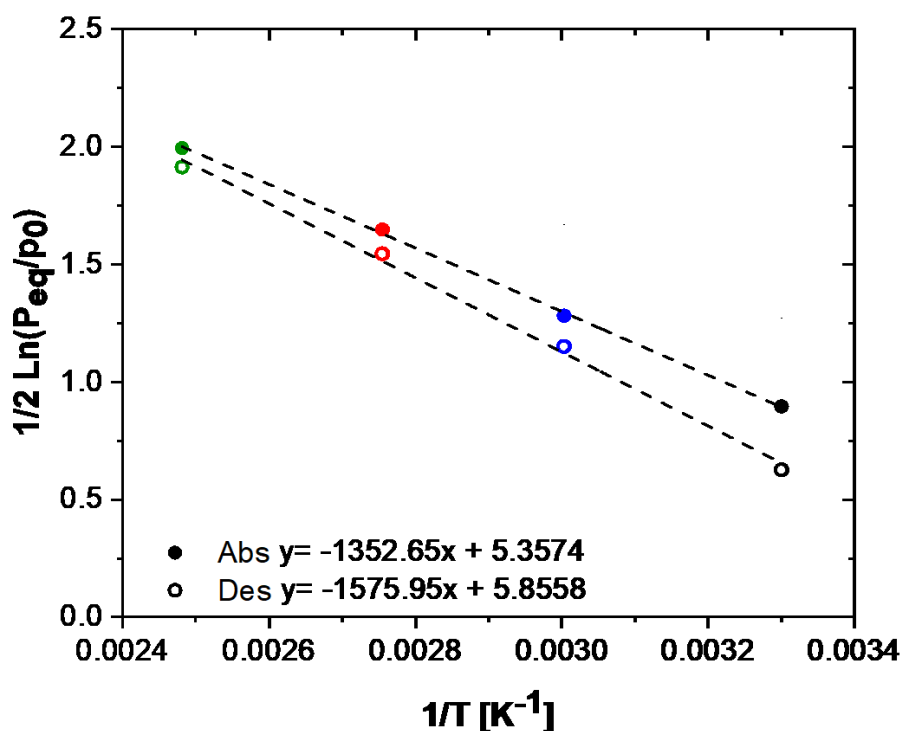

**Fig. S2.** Van't Hoff plot for the absorption and desorption pressure at  $c_H = H/M = 0.5$ .

**Table S2.** Thermodynamic data determined by van't Hoff analyses in absorption and desorption from the experimental PCI curves. The values of enthalpy and entropy are given in kJ/mol of H and J/K.mol of H, respectively, and correspond to a hydrogen concentration equal to  $c_H = H/M = 0.5$ .

| Enthalpy [kJ/mol H] |            | Entropy [J/K.mol H] |            |
|---------------------|------------|---------------------|------------|
| Absorption          | Desorption | Absorption          | Desorption |
| -11.246             | -13.102    | 0.045               | 0.049      |

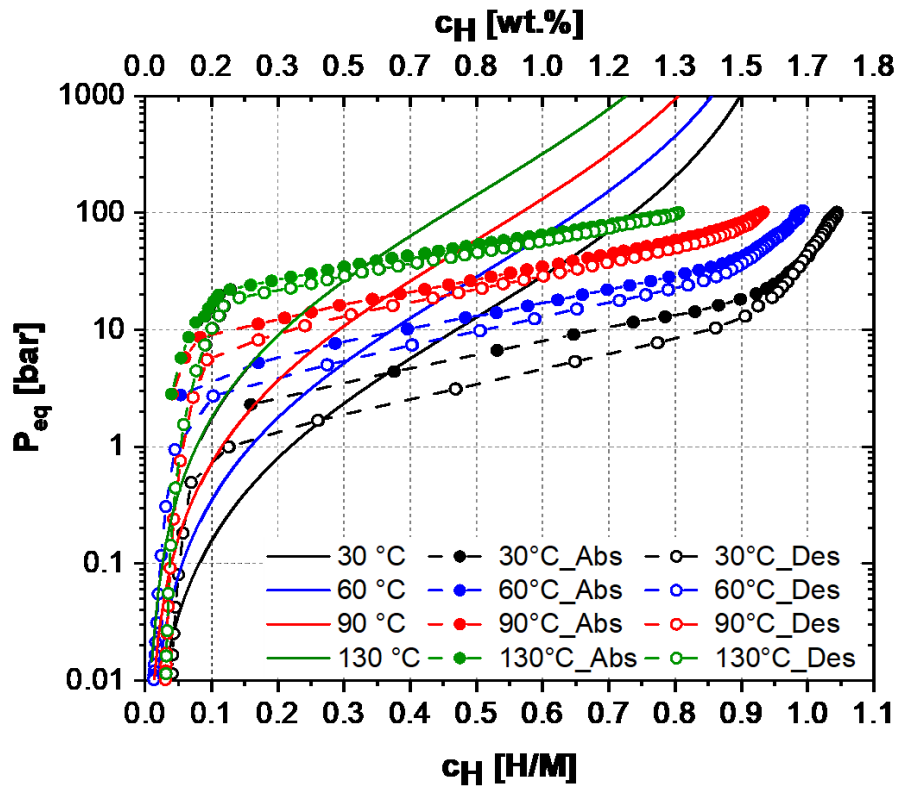

**Fig. S3.** Experimental PCIs of  $(\text{Ti}_{0.5}\text{Zr}_{0.5})_1(\text{Fe}_{0.33}\text{Mn}_{0.33}\text{Cr}_{0.33})_2$  alloy at 30 °C, 60 °C, 90 °C and 130 °C (dash lines) compared with the calculated PCIs at the same temperatures (solid lines).

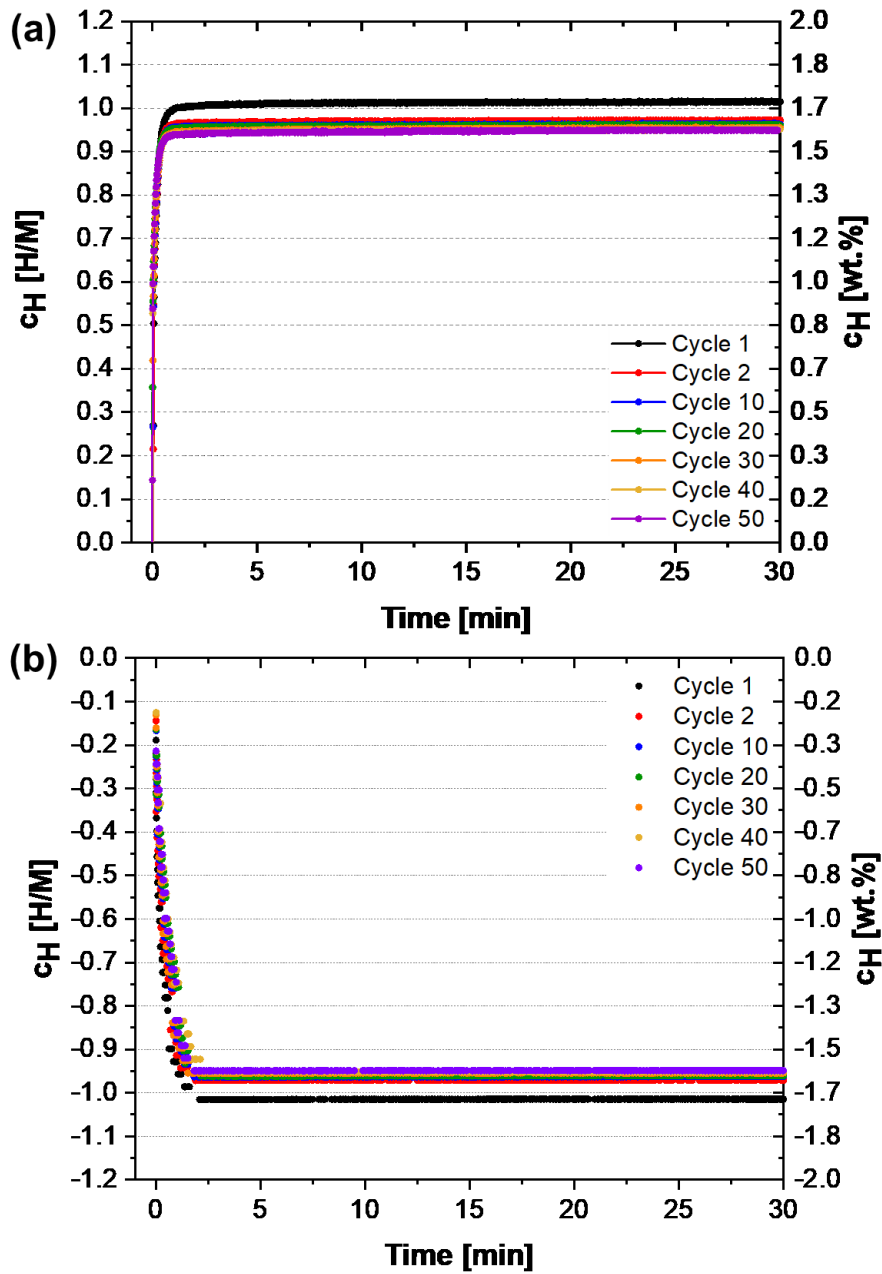

**Fig. S4.** Measurement of hydrogen (a) absorption and (b) desorption kinetics at 30 °C in H/M and wt.% of the  $(\text{Ti}_{0.5}\text{Zr}_{0.5})_1(\text{Fe}_{0.33}\text{Mn}_{0.33}\text{Cr}_{0.33})_2$  alloy under an initial hydrogen pressure of 52 bar. At the end of the absorption measurement, the hydrogen pressure was 48 bar, and during desorption, 0.7 bar, approximately.

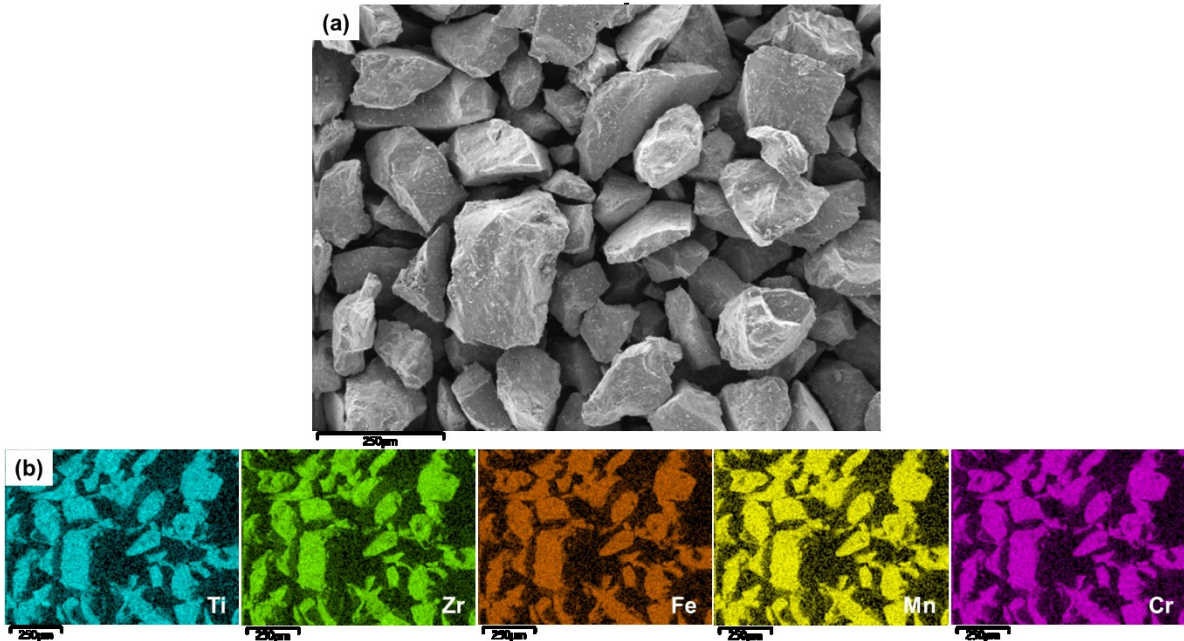

**Fig. S5.** SEM image and corresponding EDX elemental mappings of the as-cast  $(\text{Ti}_{0.5}\text{Zr}_{0.5})_1(\text{Fe}_{0.33}\text{Mn}_{0.33}\text{Cr}_{0.33})_2$  alloy in the powder state. a) SEM images using the Back-Scattered Electrons (BSE) and b) EDX elemental mappings with selected elements: Ti, Zr, Fe, Mn, and Cr.

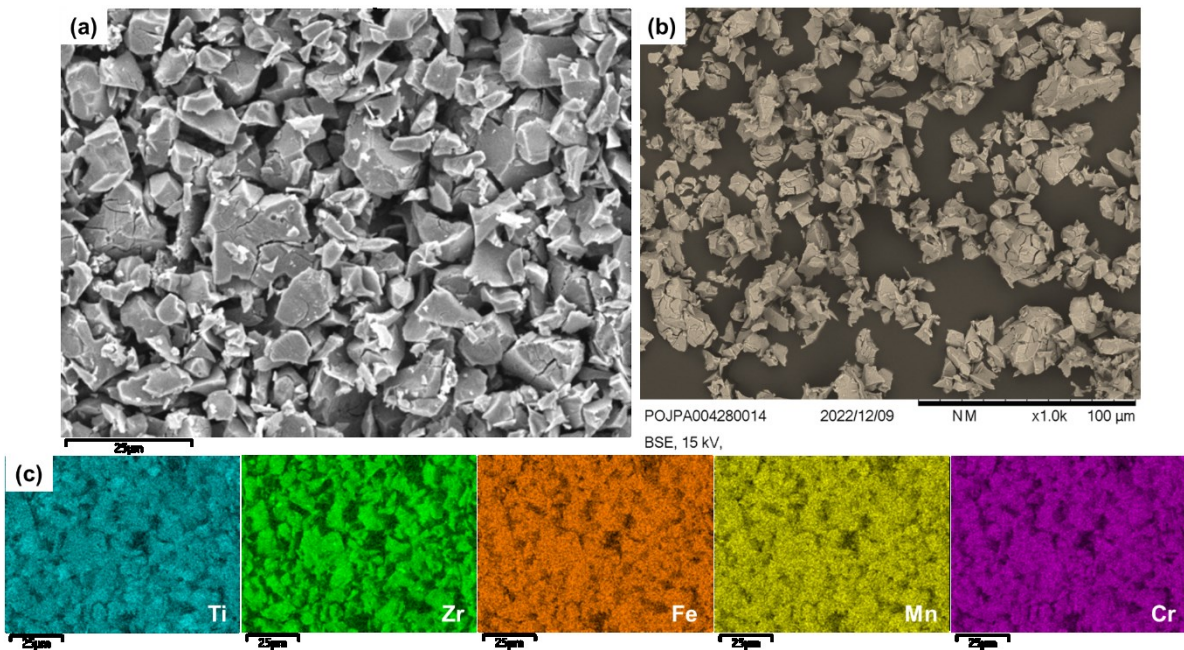

**Fig. S6.** SEM image and corresponding EDX elemental mappings of the  $(\text{Ti}_{0.5}\text{Zr}_{0.5})_1(\text{Fe}_{0.33}\text{Mn}_{0.33}\text{Cr}_{0.33})_2$  alloy after one hydrogenation/dehydrogenation cycle a) and b) SEM images using the Back-Scattered Electrons (BSE) and c) EDS elemental mappings with selected elements: Ti, Zr, Fe, Mn, and Cr.

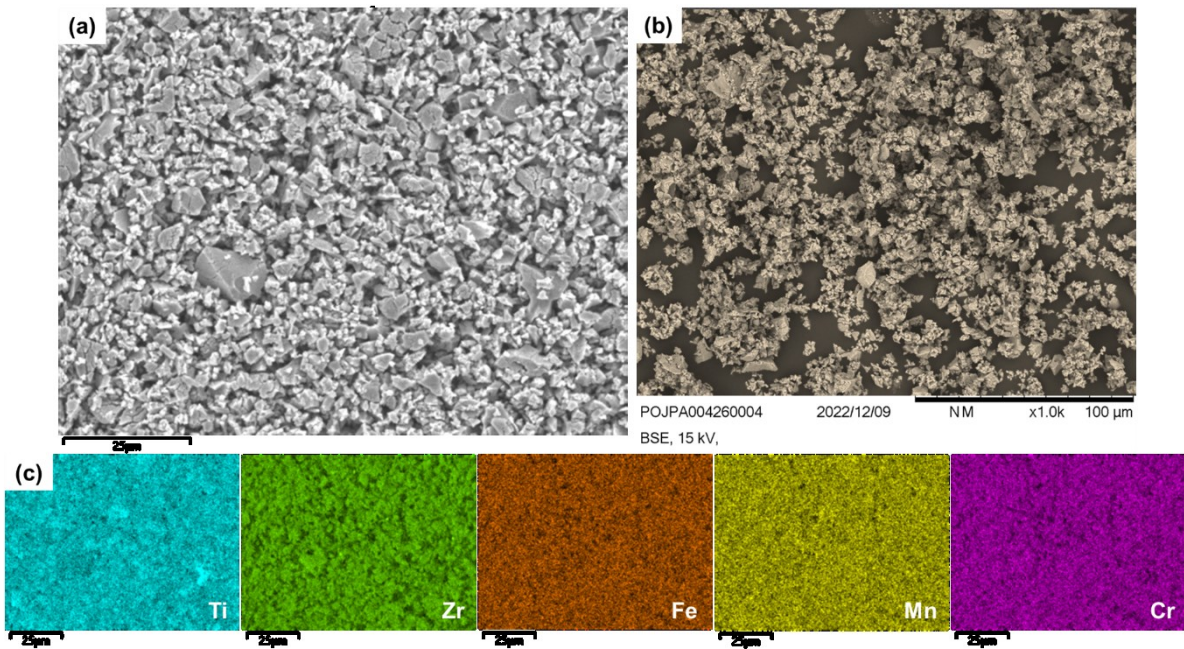

**Fig. S7.** SEM image and corresponding EDX elemental mappings of the  $(\text{Ti}_{0.5}\text{Zr}_{0.5})_1(\text{Fe}_{0.33}\text{Mn}_{0.33}\text{Cr}_{0.33})_2$  alloy after fifty hydrogenation/dehydrogenation cycles a) and b) SEM images using the Back-Scattered Electrons (BSE) and c) EDS elemental mappings with selected elements: Ti, Zr, Fe, Mn, and Cr.

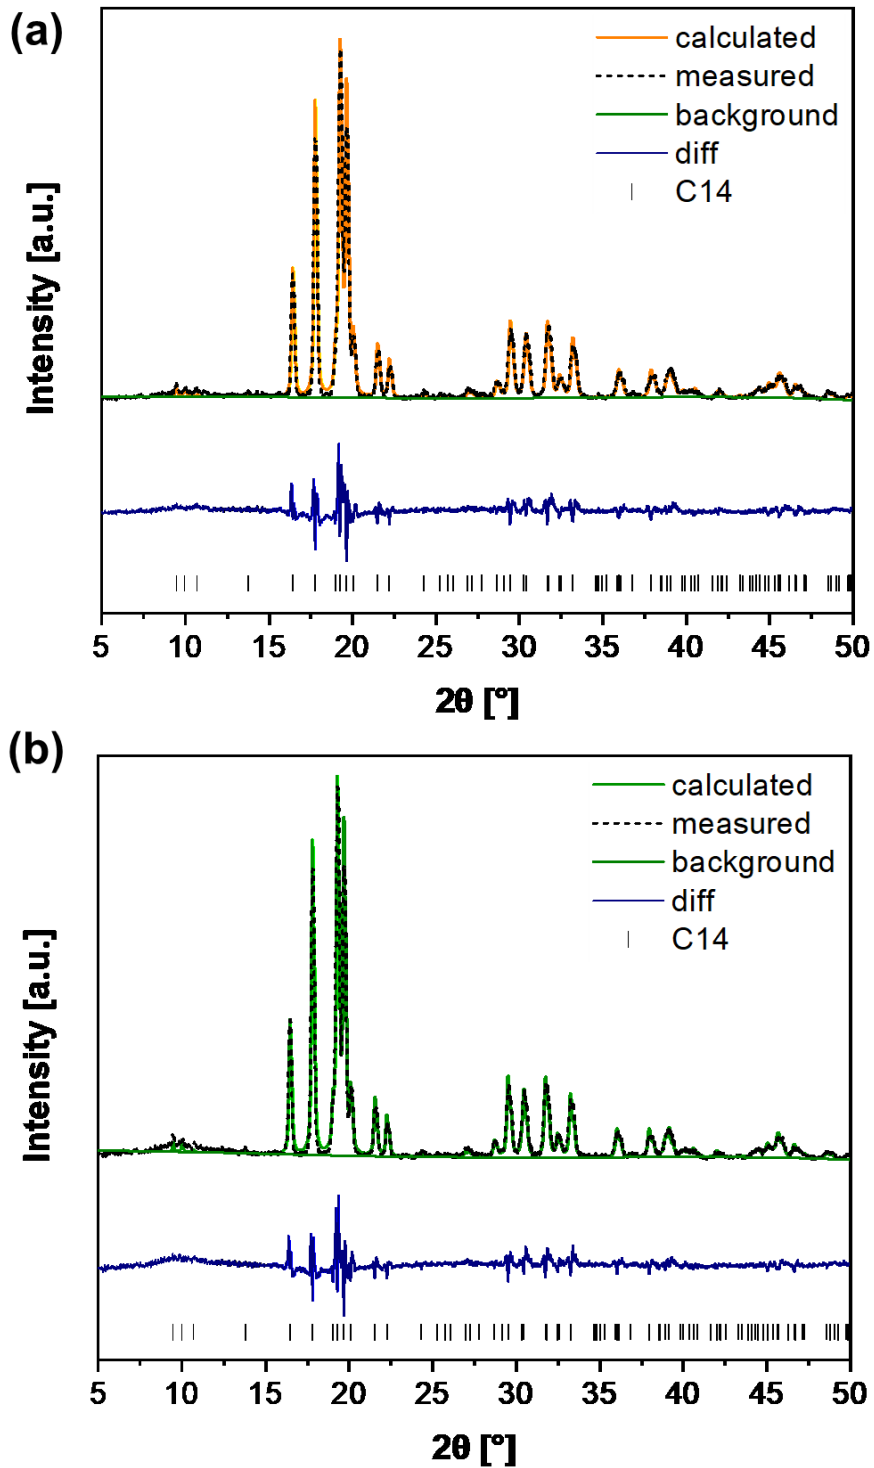

**Fig. S8.** Rietveld refinement of the XRD pattern of the  $(\text{Ti}_{0.5}\text{Zr}_{0.5})_1(\text{Fe}_{0.33}\text{Mn}_{0.33}\text{Cr}_{0.33})_2$  alloy after (a) 1<sup>st</sup> and (b) 50<sup>th</sup> cycles of hydrogen absorption and desorption indicating that the sample have C14 Laves phase structure. No reflections from a second phase can be seen.
